# Supplementary material for: Evaluating Atmospheric pressure Solids Analysis Probe (ASAP) mass spectrometry for the analysis of low molecular weight synthetic polymers
Source: Royal Society of Chemistry journal article supplement (doi:10.1039/c2an35556f), 2012-01-01
Supplement: c2an35556f.pdf [file c2an35556f.pdf]

Cite this: DOI: 10.1039/c0xx00000x

www.rsc.org/xxxxxx

ARTICLE TYPE

## Evaluating Atmospheric pressure Solids Analysis Probe (ASAP) mass spectrometry for the analysis of low molecular weight synthetic polymers: Supplementary Information.

Michael J. P. Smith<sup>\*a</sup>, Neil R. Cameron<sup>a</sup> and Jackie A. Mosely<sup>a</sup>

<sup>5</sup> Received (in XXX, XXX) Xth XXXXXXXXXX 20XX, Accepted Xth XXXXXXXXXX 20XX

DOI: 10.1039/b000000x

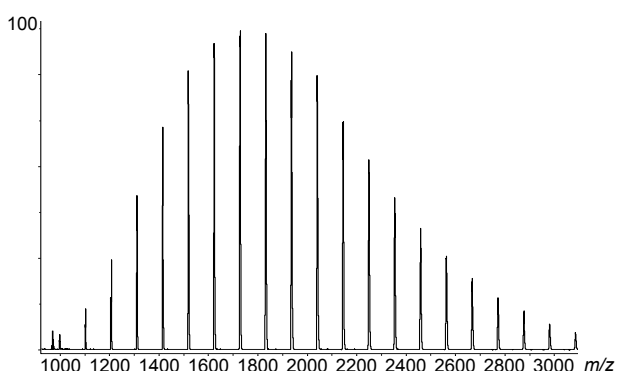

**Supplementary Information 1.** MALDI MS of Poly(styrene)  $M_n$  1770.

<sup>10</sup> Sample was prepared such that PS:Dithranol:AgTFA mixed 1:9:1. All solutions were 10 mg/ml in THF. Analyses were performed on the Autoflex II ToF/ToF MS with a 337 nm nitrogen laser (Bruker Daltonics Ltd., Coventry, UK).

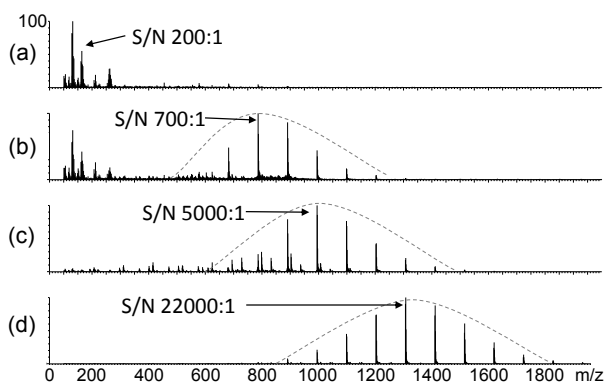

<sup>15</sup> **Supplementary Information 2.** The effect of desolvation gas temperature upon ASAP of Poly(styrene) dissolved in acetone at 10 mg/ml at (a) 300 °C, (b) 400 °C, 500 °C and (d) 600 °C.

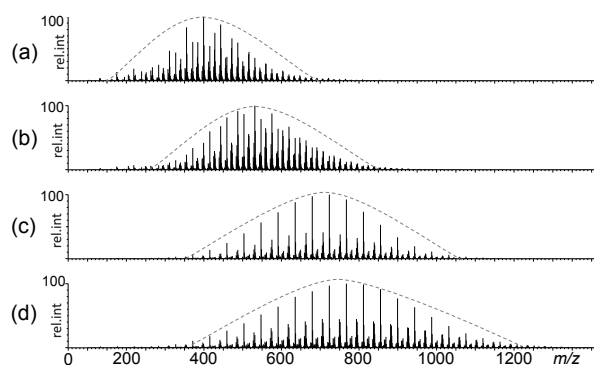

<sup>20</sup> **Supplementary Information 3.** The effect of desolvation gas temperature upon ASAP of Poly(ethylene glycol) at (a) 300 °C, (b) 400 °C, (c) 500 °C and (d) 600 °C.

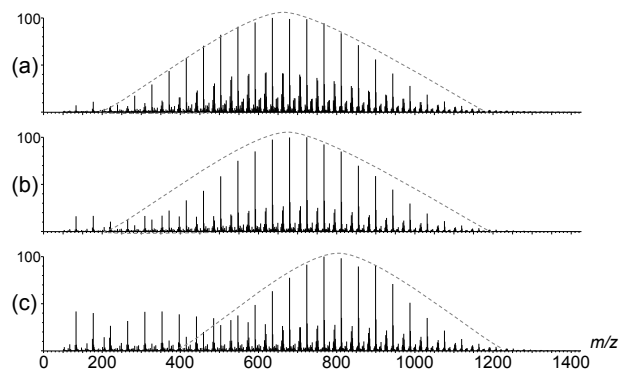

<sup>25</sup> **Supplementary Information 4.** The effect of sample cone voltage upon ASAP of Poly(ethylene glycol) at (a) 10 eV, (b) 20 eV and (c) 30 eV.

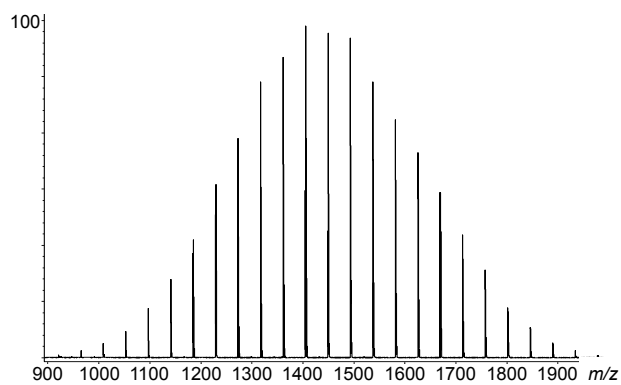

**Supplementary Information 5.** MALDI MS of Poly(ethylene glycol)  $M_n$  1430. Sample was prepared such that PEG:DHB:NaI mixed 1:9:1. All solutions were 10 mg/ml in THF. Analyses were performed on the  
s Autoflex II ToF/ToF MS with a 337 nm nitrogen laser (Bruker Daltonics Ltd., Coventry, UK).
